# Supplementary material
Source: Springer Nature journal article supplement (https://www.springermedizin.de/resource/supplementary/12936_2011_1995_MOESM2_ESM.pdf/9543282)

**A**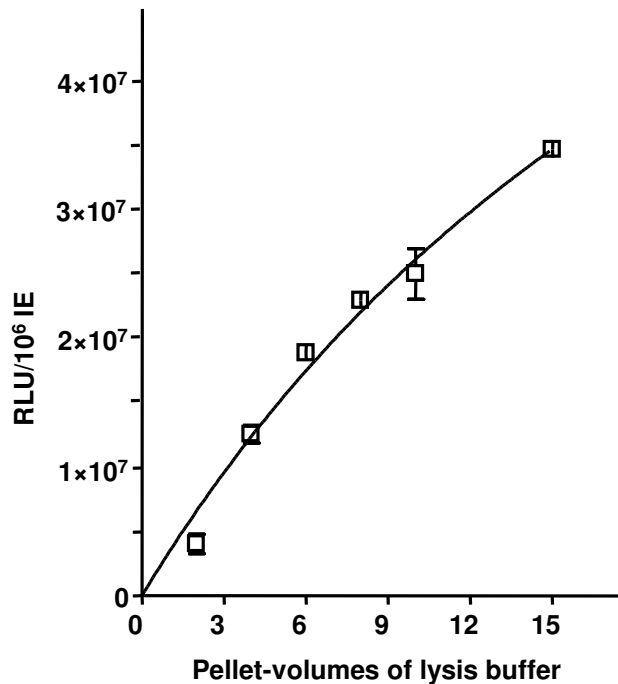**B**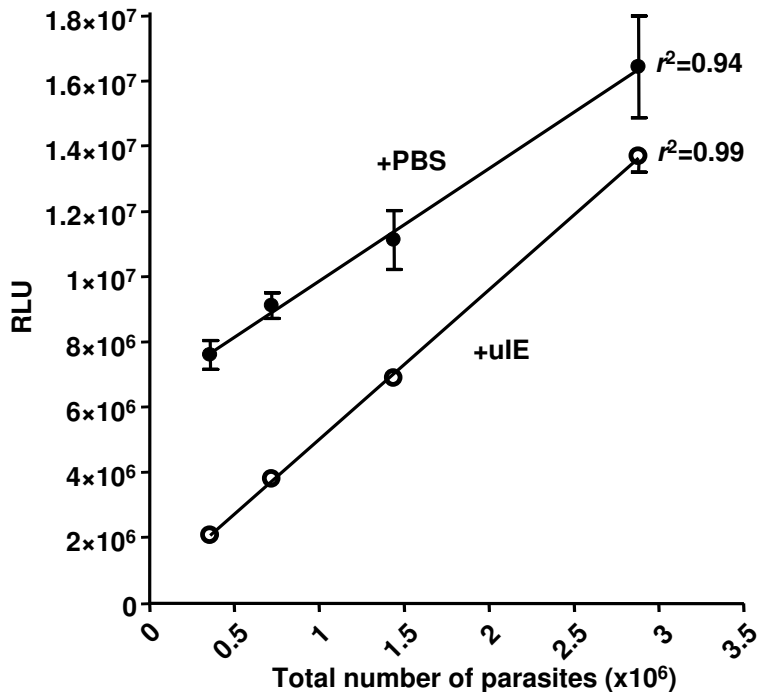

Supplement: MOESM2 [file 9543282]
